# Supplementary figures and images for: Gle1 is required for tRNA to stimulate Dbp5 ATPase activity in vitro and promote Dbp5-mediated tRNA export in vivo in Saccharomyces cerevisiae
Source: eLife journal article supplement (doi:10.7554/elife.89835), 2023-08-24

Figure 1F

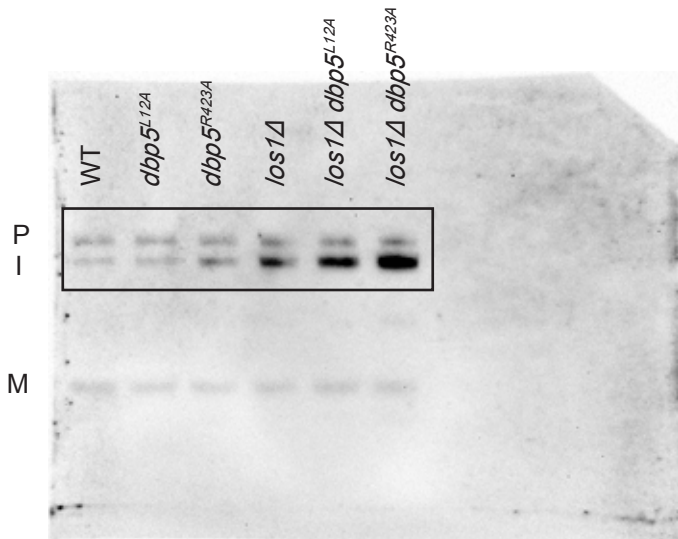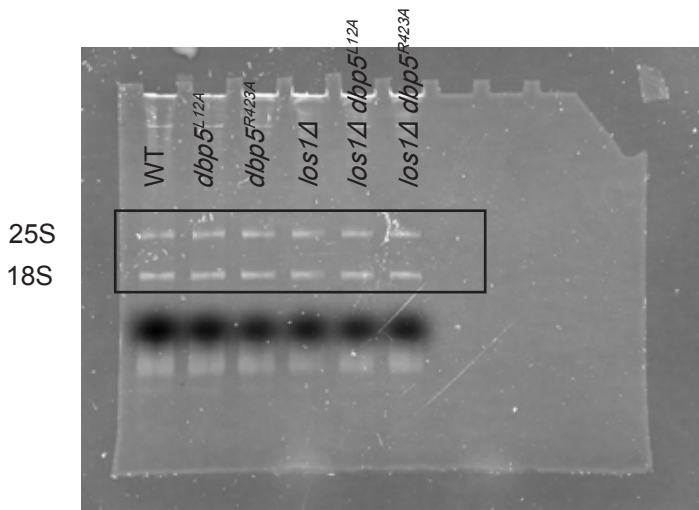

Supplement: fig1-data2 [file elife-89835-fig1-data2-v1.zip]

Figure 3A

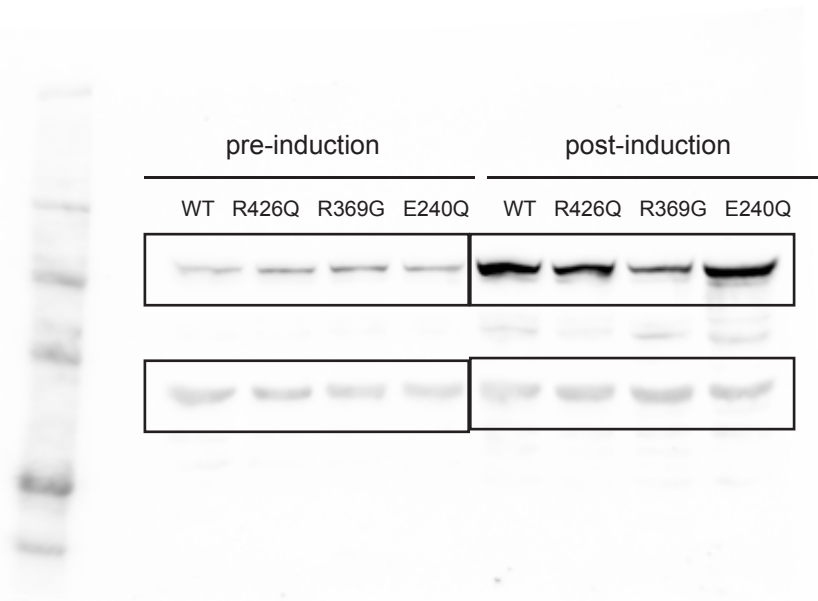

Figure 3C

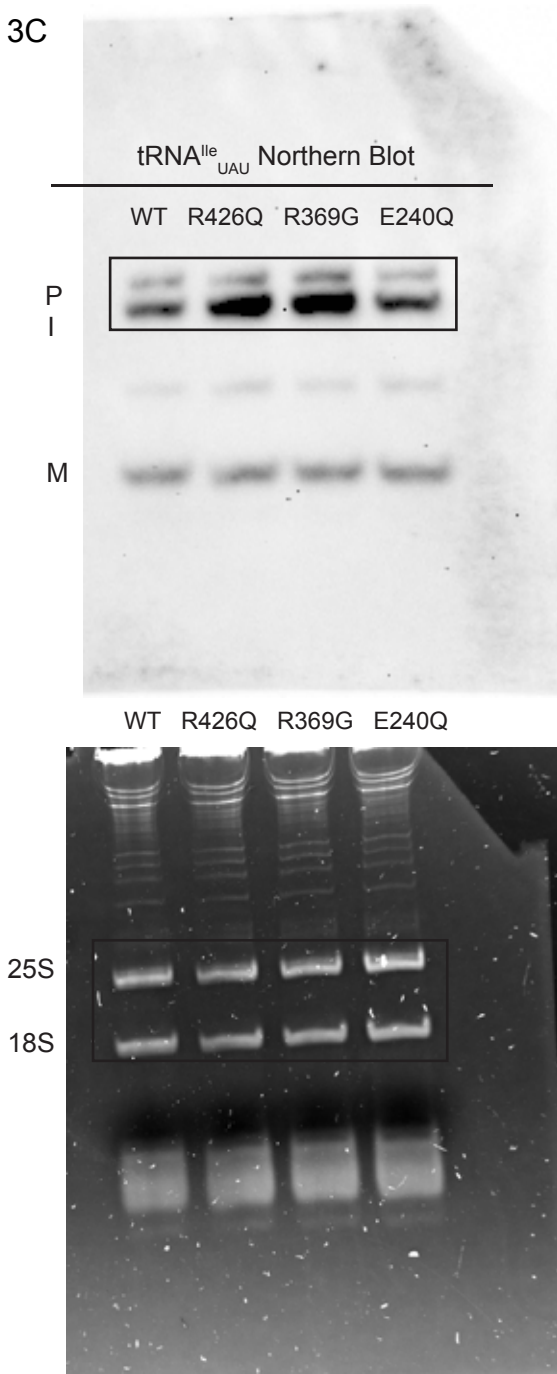

Supplement: fig3-data2 [file elife-89835-fig3-data2-v1.zip]

Figure 4A

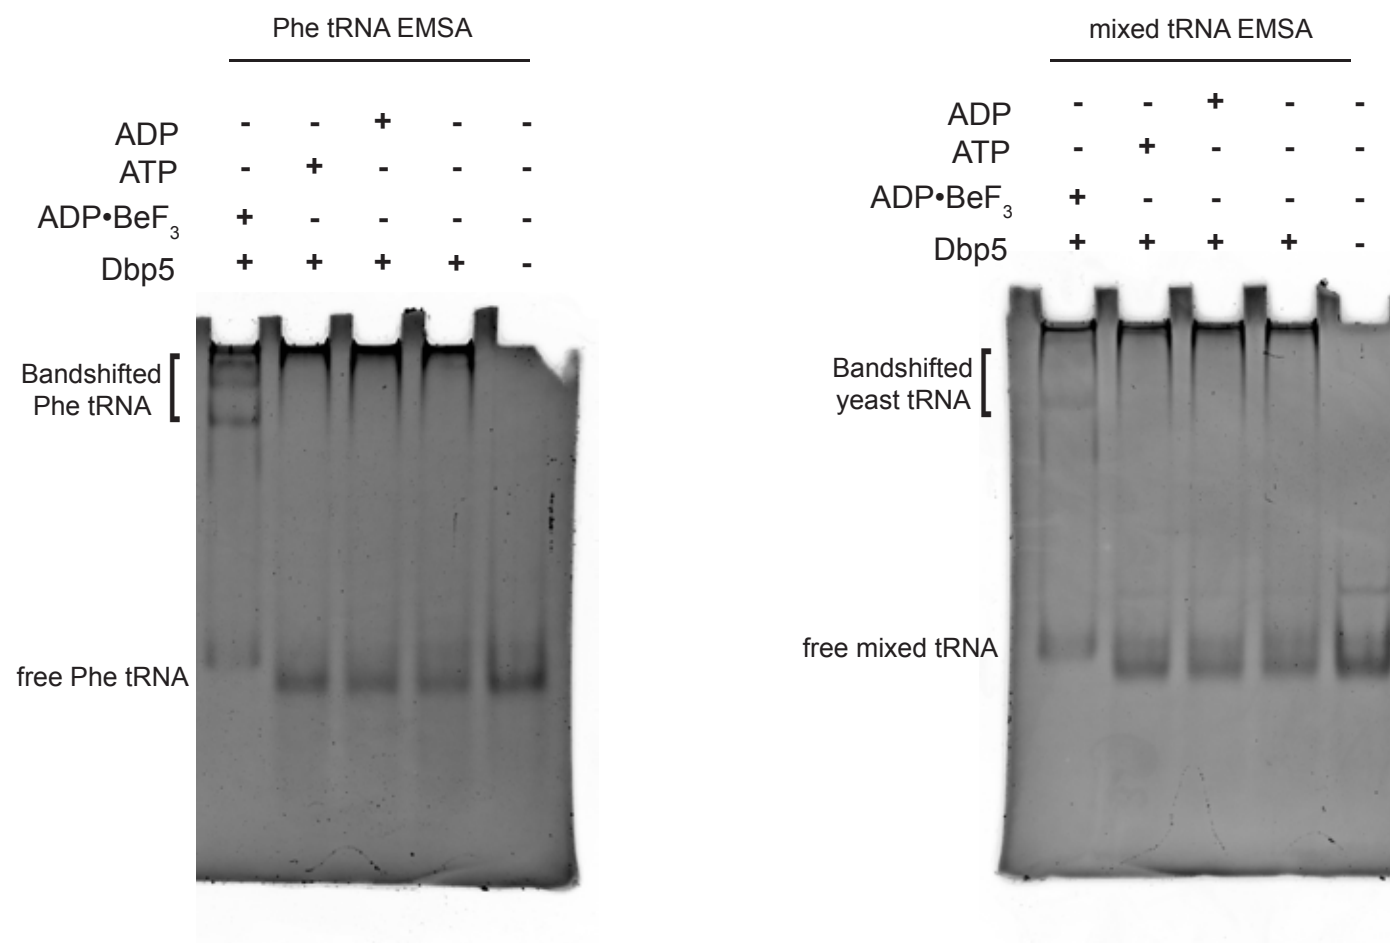

Figure 4B

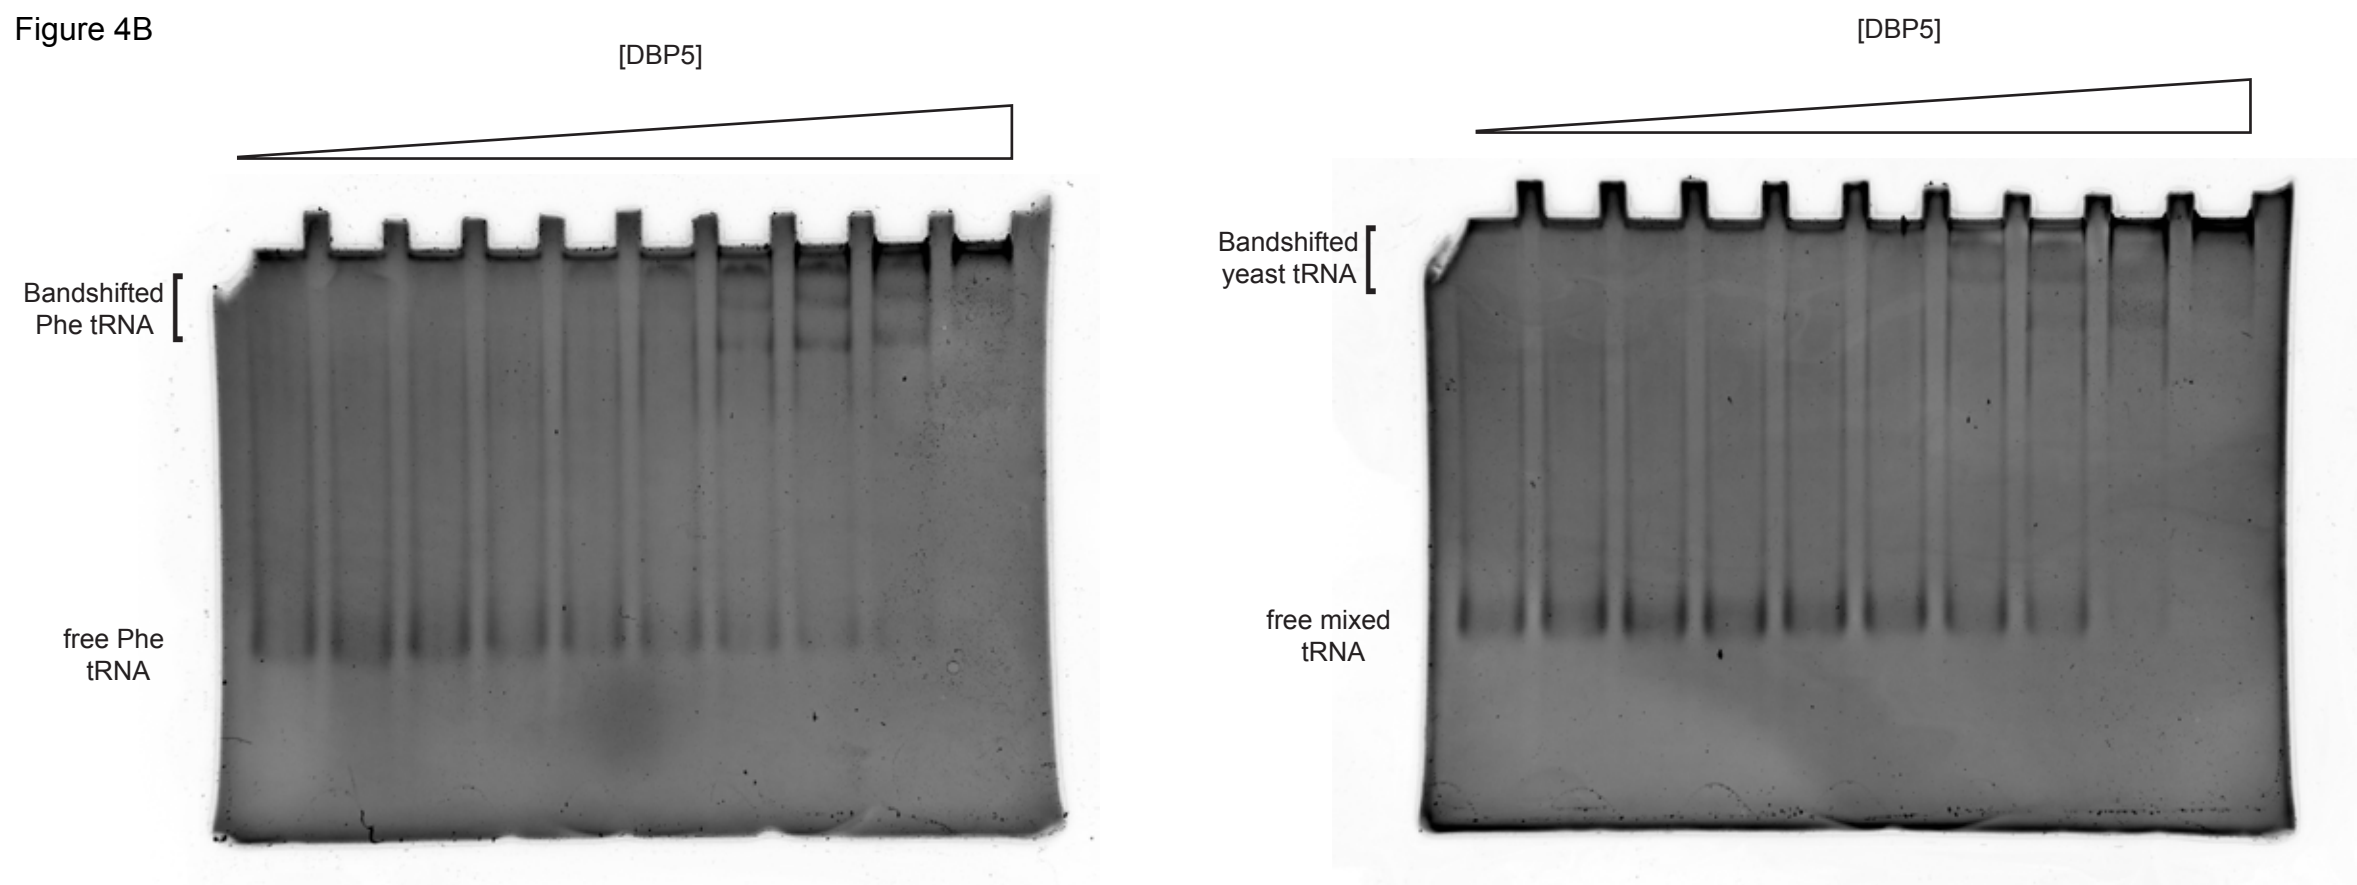

Supplement: fig4-data1 [file elife-89835-fig4-data1-v1.zip]

Figure 5D

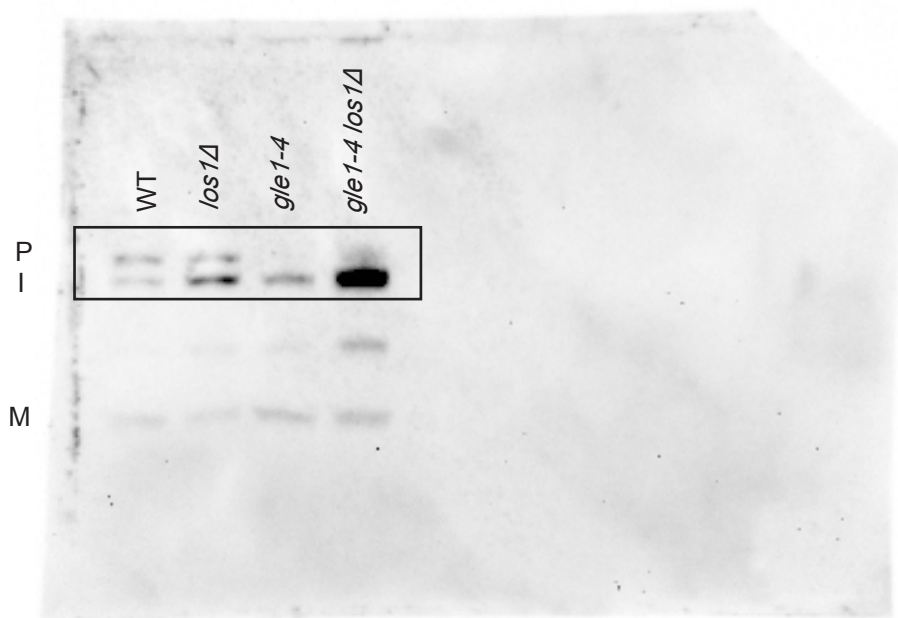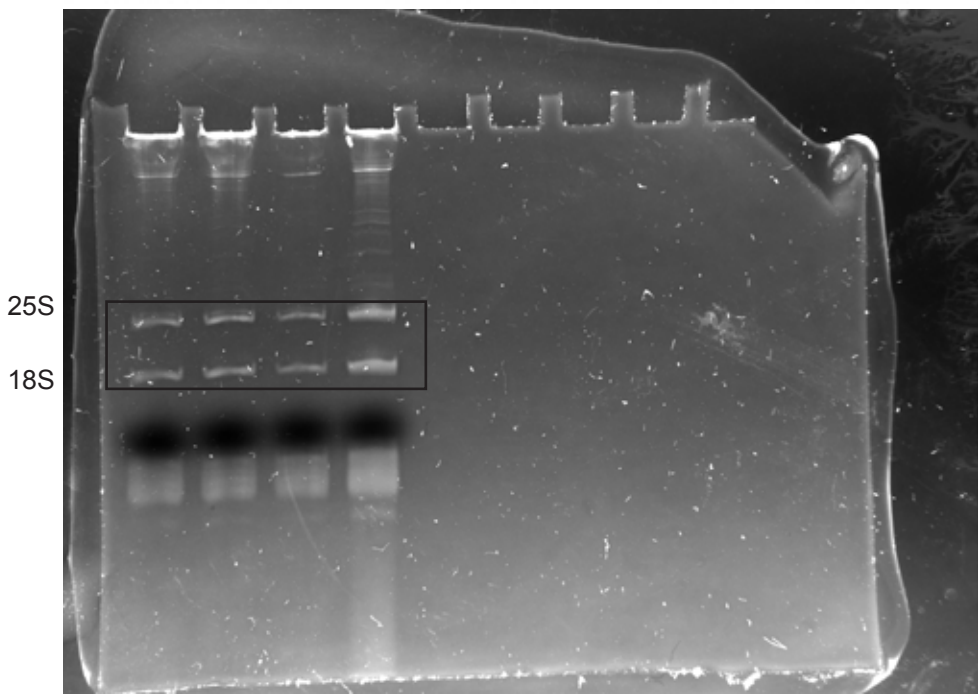

Supplement: fig5-data2 [file elife-89835-fig5-data2-v1.zip]
